# Supplementary material for: Bis-pyrene-based supramolecular aggregates with reversibly mechanochromic and vapochromic responsiveness
Source: Royal Society of Chemistry journal article supplement (doi:10.1039/c3tc31974a), 2013-12-02
Supplement: c3tc31974a.pdf [file c3tc31974a.pdf]

# **Bis-Pyrene-Based Supramolecular Aggregates with Reversibly Mechanochromic and Vapochromic Responsiveness**

Wei Li,<sup>a,§</sup> Lei Wang,<sup>b,§</sup> Jing-Ping Zhang\*<sup>a</sup> and Hao Wang\*<sup>b</sup>

<sup>a</sup>Faculty of Chemistry,

Northeast Normal University,

Changchun, 130024, PR China

E-mail: zhangjp162@nenu.edu.cn

<sup>b</sup>CAS Key Laboratory for Biological Effects of Nanomaterials and Nanosafety,

National Center for Nanoscience and Technology (NCNST),

Beijing, 100190, PR China

E-mail: wanghao@nanoctr.cn

**Materials.** All reagents and solvents were purchased from commercially available sources and used without further purification.

**Instrument and measurements.**  $^1\text{H}$  NMR spectra were recorded on an Advance Bruker 400M spectrometer in deuterated chloroform. Chemical shifts are quoted in parts per million (ppm) and referenced to tetramethylsilane. The  $^{13}\text{C}$  NMR spectra were recorded at 100 MHz on the same spectrometer in deuterated chloroform. Chemical shifts were defined relative to the  $^{13}\text{C}$  resonance shift of chloroform (77.0 ppm). The UV absorption was determined with a Shimadzu 2600 UV/vis spectrometer. Fluorescence spectrum was recorded on F-280 spectrometer from Tianjin Gangdong Sci&Tech. Development. Co., Ltd. Microflex LRF MALDI-TOF was used to determine the molecular mass. High-resolution mass spectrometry was taken on a GCT Premier from Waters Co. Time-resolved fluorescence spectra were measured with Edinburgh Analytical Instruments F900 (Edinburgh Instruments). The powder X-ray diffraction (XRD) was measured on D/MAX-TTRIII (CBO). SEM was measured on High Resolution Field Emission Scanning Electron Microscopy of NOVA NanoSEM 430. The absolute fluorescence quantum yields were determined by Nanolog (HORIBA).

**Synthesis:** General Friedel-Crafts acylation procedure: Pyrene (2.02 g, 10.00 mmol) and alkyl dichloride or aryl chloride (5.00 mmol) were dissolved in dichloromethane (50 mL), and the mixture was cooled to 0 °C. After the portion-wise addition of  $\text{AlCl}_3$  (2.00 g, 15.00 mmol), the mixture was allowed to react overnight at room temperature, and then the mixture was poured into ice-water and stirred until the color of the organic phase turned from black to yellow. The aqueous phase was extracted with dichloromethane. The combined organic phases were dried with  $\text{MgSO}_4$ , and the solvent was evaporated. The residue was purified by column chromatography.

**Compound *m*-BP:** This compound was prepared according to the general procedure and obtained as yellow solid (silica gel,  $\text{CH}_2\text{Cl}_2$ :hexane 3/1 as eluent, 1.62 g, 60.7%).  $^1\text{H}$  NMR: 8.40 (d,  $J = 9.2$  Hz, 2H), 8.32 (s, 1H), 8.24 (t,  $J = 7.5$  Hz, 4H), 8.18 (dd,  $J = 7.8, 1.7$  Hz, 2H), 8.13 (dd,  $J = 9.1, 5.8$  Hz, 4H), 8.09-7.97 (m, 8H), 7.64 (t,  $J =$

7.7 Hz, 1H).  $^{13}\text{C}$ -NMR: 198.28, 140.15, 135.46, 134.28, 133.52, 132.90, 132.04, 131.52, 130.84, 130.28, 130.06, 139.81, 128.03, 127.39, 127.17, 127.00, 125.72, 125.49, 125.24, 124.67. MALDI-TOF: calcd. for  $\text{C}_{40}\text{H}_{22}\text{O}_2$  534.16, found  $\text{M}+\text{H}^+$  535.05. HRMS: calcd. for  $\text{C}_{40}\text{H}_{22}\text{O}_2$  534.1620, found  $\text{M}^+$  534.1620.

**Compound p-BP:** This compound was prepared according to the general procedure and obtained as yellow solid ( $\text{CH}_2\text{Cl}_2$ :hexane 2/1 as eluent, 1.21 g, 44.81%).  $^1\text{H}$  NMR: 8.47 (d,  $J = 9.2$  Hz, 2H), 8.28 (dd,  $J = 7.4, 5.5$  Hz, 4H), 8.24-8.08 (m, 12H), 8.00 (s, 4H).  $^{13}\text{C}$  NMR spectrum was not available due to the low solubility of compound. MALDI-TOF: calcd. for  $\text{C}_{40}\text{H}_{22}\text{O}_2$  534.16, found  $\text{M}^+$  534.88. HRMS: calcd. for  $\text{C}_{40}\text{H}_{22}\text{O}_2$  534.1620, found  $\text{M}^+$  534.1620.

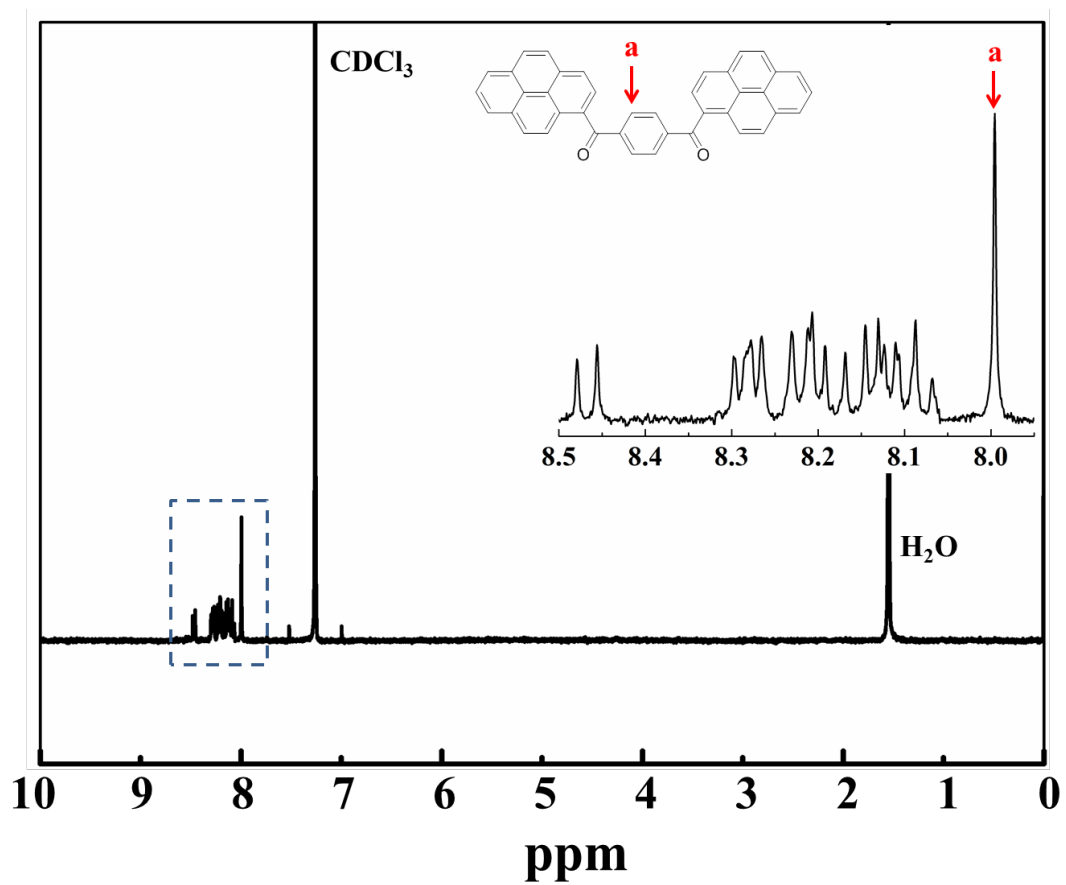

**Figure S1**  $^1\text{H}$  NMR spectrum of compound *p*-BP in  $\text{CDCl}_3$ . The inset represents a zoom of the NMR region 7.95–8.5 ppm and shows the characteristic NMR signals of *p*-BP.

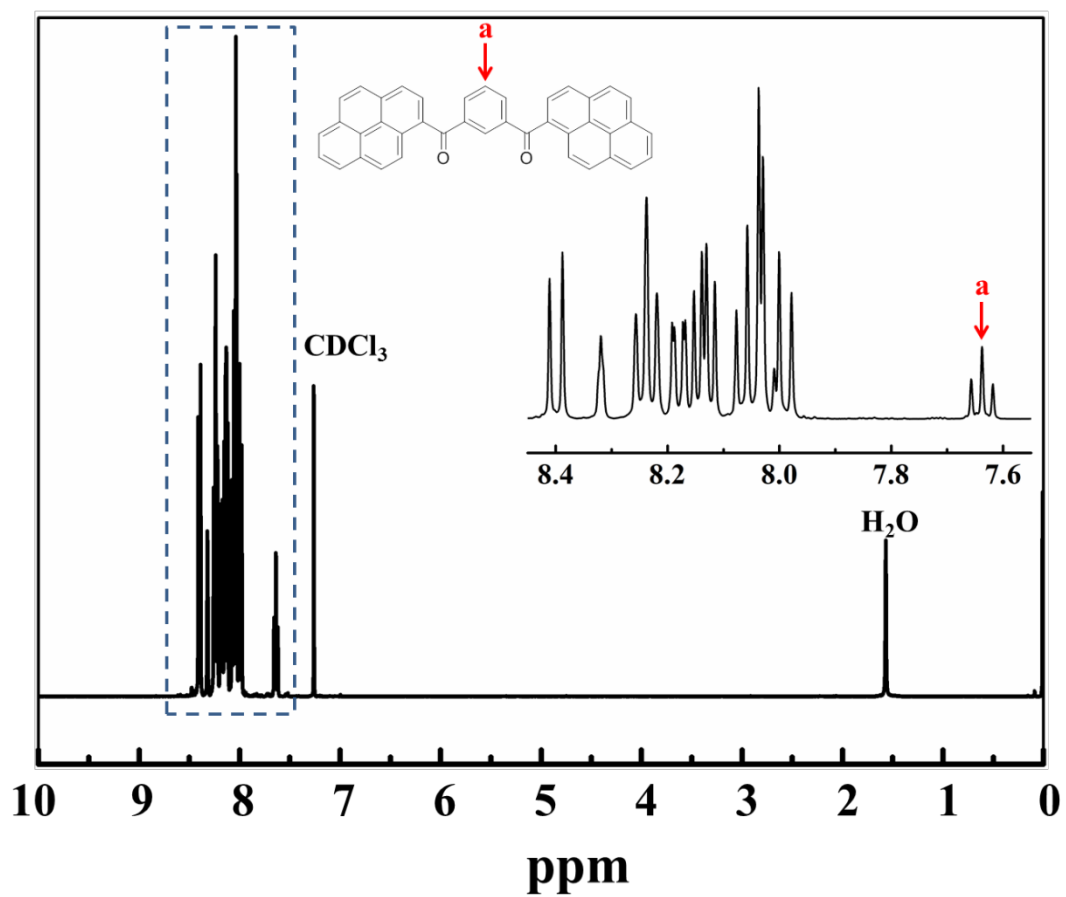

**Figure S2.**  $^1\text{H}$  NMR spectrum of compound *m*-BP in  $\text{CDCl}_3$ . The inset represents a zoom of the NMR region 7.55–8.45 ppm and shows the characteristic NMR signals of *m*-BP.

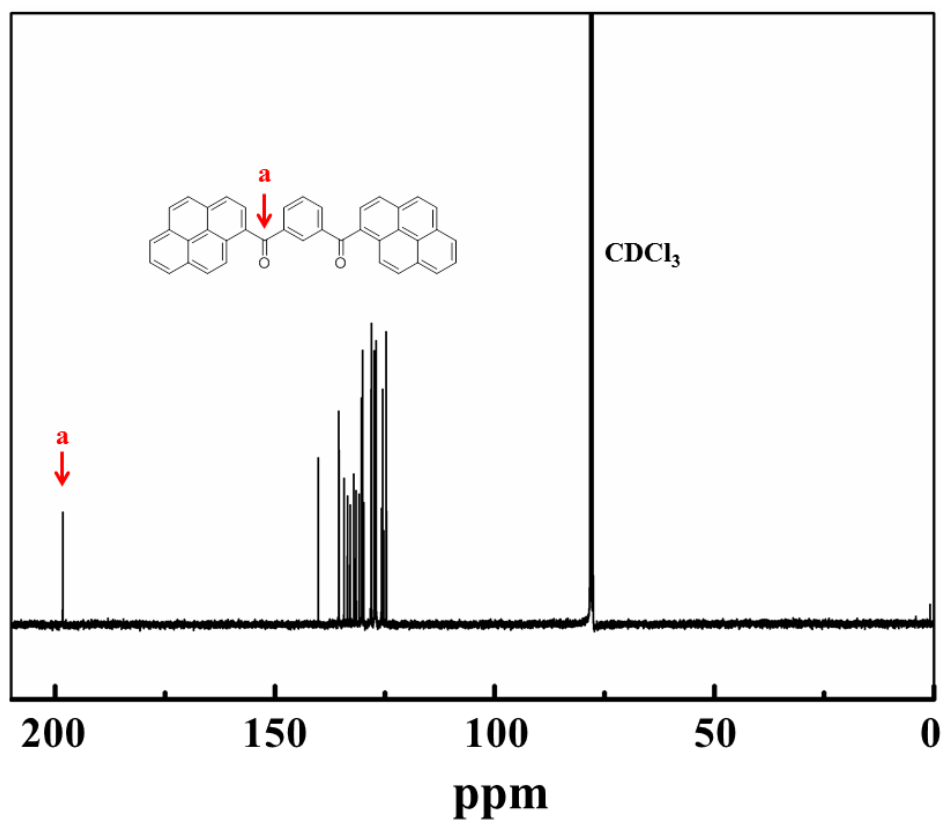

**Figure S3.**  $^{13}\text{C}$  NMR spectrum of compound *m*-BP in  $\text{CDCl}_3$ .

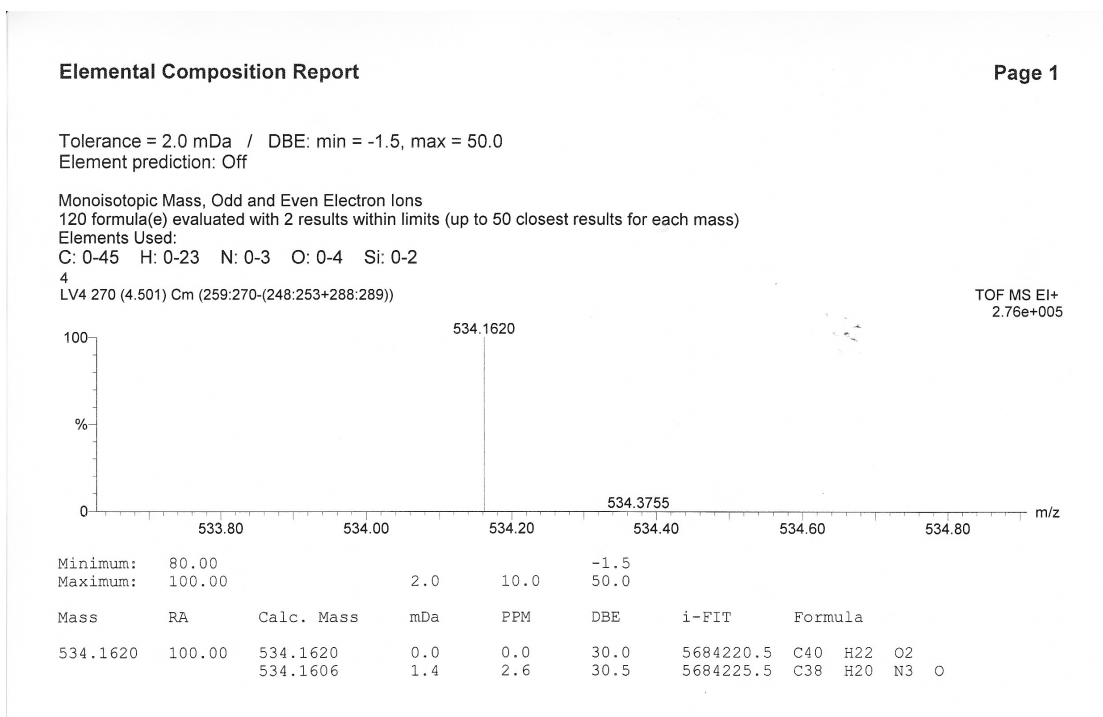

**Figure S4.** The EI-MS spectrum of compound *p*-BP.

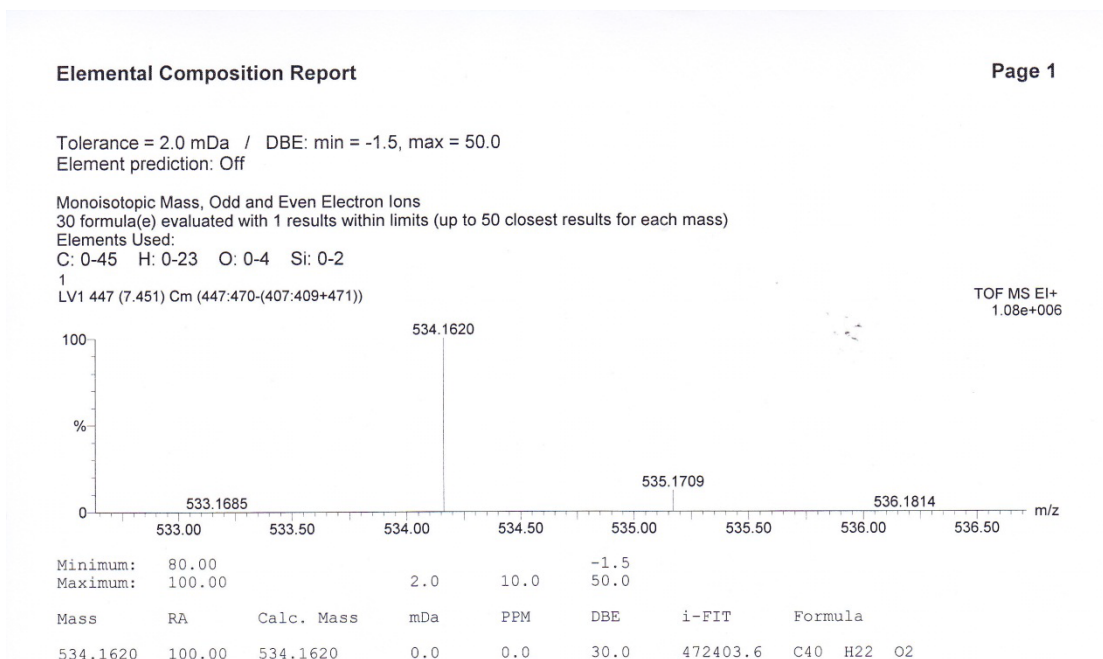

**Figure S5.** The EI-MS spectrum of compound *m*-BP.
